# Supplementary material
Source: Springer Nature journal article supplement (https://www.springermedizin.de/resource/supplementary/12939_2012_381_MOESM3_ESM.pdf/9551016)

# Correlates of Catastrophic Health Expenditure

## Log Odds Ratio

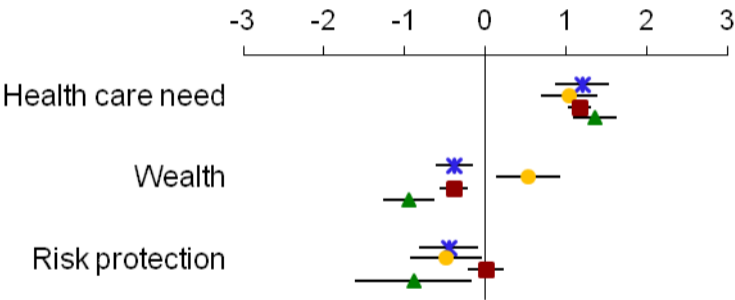

✱ China (n=3716)

● Malaysia (n=5292)

Supplement: MOESM3 [file 9551016]
